# Supplementary material for: Adjuvant Selection for Influenza and RSV Prefusion Subunit Vaccines
Source: Vaccines (Basel). 2021 Jan 20;9(2):71. doi: 10.3390/vaccines9020071 (PMC7909420; doi:10.3390/vaccines9020071)
Supplement: Supplementary file 1 [file vaccines-09-00071-s001.xlsx]

## Sheet: Isotyping
Table S1
IgG1		HA clamp				Geometric mean	Mean	F clamp				Geometric mean	Mean
	QS21	8928.57	10093.9	8710.8	7800.31	8846.11	8883.39	2162.16	2589.33	2403.85	1787.31	2214.6	2235.66
	Alhydrogel	9727.63	9727.63	10228.1	5316.32	8469.44	8749.92	39761.4	12856.8	28441.4	13041.2	20867.3	23525.2
	Addavax	19327.4	28105.7	27151.8	26581.6	25022.9	25291.6	17079.4	14889.8	3993.61	2089.86	6787.53	9513.18
	AdQS21	9514.75	11931.8	12347.2	10260.6	10951.2	11013.6	19275.3	34578.1	24038.5	41000.4	28469.1	29723.1
	ALF55	11398.6	10551.9	17400.4	16270.7	13584.3	13905.4	6825.94	3654.97	1746.72	14945.4	5051.79	6793.27
	Antigen only	216.826	157.183	100	150.353	150.455	156.091	100	100	721.501	100	163.893	255.375
	PBS	100	100	100	100	100	100	100	100	100	100	100	100
IgG2a
	QS21	3552.4	3279.76	3947.89	3567.61	3579.12	3586.91	100	159.134	100	290.782	146.667	162.479
	Alhydrogel	867.303	821.018	1152.6	407.332	760.393	812.064	863.558	1223.54	999.001	444.05	827.422	882.537
	Addavax	2959.46	2965.6	2773.93	3027.55	2930.07	2931.63	552.486	479.386	100	100	226.857	307.968
	AdQS21	1335.83	1361.29	1518.37	1728.31	1478	1485.95	2655.34	4878.05	1292.66	4297.38	2912.48	3280.86
	ALF55	1811.59	2456.4	2688.17	2129.47	2246.58	2271.41	354.736	100	238.095	2514.46	381.746	801.822
	Antigen only	100	100	100	100	100	100	100	100	100	100	100	100
	PBS	100	100	100	100	100	100	100	100	100	100	100	100
IgG3
	QS21	1063.6	892.061	1387.15	984.252	1066.85	1081.77	190.767	258.131	145.243	100	163.535	173.535
	Alhydrogel	791.139	676.59	941.62	940.734	829.813	837.521	1554.48	670.241	1304.63	696.379	986.365	1056.43
	Addavax	1548.23	1001.2	1455.18	1936.86	1445.75	1485.37	490.196	525.762	183.251	102.114	263.525	325.331
	AdQS21	630.915	765.111	574.383	549.451	624.75	629.965	1091.58	2439.02	2123.59	1190.9	1610.85	1711.28
	ALF55	1175.5	1222.34	976.562	782.473	1023.64	1039.22	2172.5	677.048	304.414	846.74	784.69	1000.17
	Antigen only	100	100	100	100	100	100	100	100	100	100	100	100
	PBS	100	100	100	100	100	100	100	100	100	100	100	100
IgG2b
	QS21	1287.66	956.938	1537.99	1284.03	1248.97	1266.65	100	149.701	100	100	110.613	112.425
	Alhydrogel	873.362	686.813	702.741	586.51	705.141	712.357	1305.82	481.232	728.863	560.224	711.724	769.036
	Addavax	1981.77	1284.19	1325.56	2205.07	1651.49	1699.15	1022.29	554.017	321.44	100	367.324	499.436
	AdQS21	973.71	946.074	936.33	705.219	883.134	890.333	1379.12	7092.2	994.036	1825.48	2052.54	2822.71
	ALF55	1460.49	1368.18	1622.32	1310.79	1435.75	1440.45	531.915	220.459	148.743	1094.09	371.676	498.802
	Antigen only	100	100	100	100	100	100	100	100	100	100	100	100
	PBS	100	100	100	100	100	100	100	100	100	100	100	100

## Sheet: T-cell
Table S 2
CD4 IFNg								CD8 IFNg
						Mean								Mean
	QS21	1.21	0.34	1.16	1.37	1.02			QS21	18.9	12.4	18.8	19.2	17.325
	Alhydrogel	1.01	1.42	1.17	0.46	1.015			Alhydrogel	8.6	11.4	9.5	7.3	9.2
	Addavax	0.59	1	1.46	0.87	0.98			Addavax	23.3	18.1	19.2	11.3	17.975
	AdQS21	0.61	0.78	0.328	1.18	0.7245			AdQS21	19.6	16.8	16.9	16.7	17.5
	ALF55	0.59	0.473	0.62	0.83	0.62825			ALF55	9.6	21.1	11	16.3	14.5
	Antigen only	0.66	0.73	0.51	0.4	0.575			Antigen only	15.4	8.2	10.1	12.2	11.475
	PBS	0.28	0.17	0.17	0.46	0.27			PBS	1.23	1.2	2.37	2.172	1.743
CD4 IL2								CD8 IL2
	QS21	0.54	0.24	0.41	0.38	0.3925			QS21	0.33	0.31	0.61	0.68	0.4825
	Alhydrogel	4.22	1.85	2.9	0.22	2.2975			Alhydrogel	6.8	2.74	3.48	0.58	3.4
	Addavax	0.52	0.17	0.74	0.37	0.45			Addavax	0.51	0.12	0.91	0.47	0.5025
	AdQS21	0.37	0.43	0.26	0.33	0.3475			AdQS21	0.51	0.48	0.44	0.57	0.5
	ALF55	0	0.19	0.58	0.49	0.315			ALF55	0	0.33	1.02	0.82	0.5425
	Antigen only	0.47	0.58	0.36	0.41	0.455			Antigen only	0.7	0.97	0.5	0.63	0.7
	PBS	0.19	0.21	0.14	0.2	0.185			PBS	0.3	0.46	0.39	0.29	0.36
CD4 TNFa								CD8 TNFa
	QS21	0.25	0.09	0.57	0.52	0.3575			QS21	0.14	0.18	1.07	0.92	0.5775
	Alhydrogel	0.56	0.77	0.52	0.07	0.48			Alhydrogel	0.68	0.84	0.58	0	0.525
	Addavax	0.24	0.79	0.89	0.41	0.5825			Addavax	0.24	0.79	1.3	0.54	0.7175
	AdQS21	0.26	0.59	0.15	0.76	0.44			AdQS21	0.38	0.71	0.14	1.02	0.5625
	ALF55	0.31	0.173	0.33	0.37	0.29575			ALF55	0.33	0.22	0.58	0.51	0.41
	Antigen only	0.3	0.46	0.216	0.07	0.2615			Antigen only	0.46	0.48	0.306	0.05	0.324
	PBS	0	0.2	0.13	0.142	0.118			PBS	0	0.33	0.22	0.25	0.2
